# Supplementary material for: Defective oxygen inert phase stabilized high-voltage nickel-rich cathode for high-energy lithium-ion batteries
Source: PubMed Central journal article supplement (PMC10700321; doi:10.1038/s41467-023-43792-0), 2023-12-06
Supplement: 41467_2023_43792_MOESM1_ESM.pdf [file 41467_2023_43792_MOESM1_ESM.pdf]

## Supplementary Information

# Defective oxygen inert phase stabilized high-voltage nickel-rich cathode for high-energy lithium-ion batteries

Zhongsheng Dai,<sup>1</sup> Zhujie Li,<sup>2</sup> Renjie Chen,<sup>1,2,3\*</sup> Feng Wu,<sup>1,2,3</sup> Li Li<sup>1,2,3\*</sup>

<sup>1</sup>Beijing Key Laboratory of Environmental Science and Engineering, School of Materials Science and Engineering, Beijing Institute of Technology, Beijing 100081, P. R. China

<sup>2</sup>Advanced Technology Research Institute, Beijing Institute of Technology, Jinan 250300, P. R. China

<sup>3</sup>Collaborative Innovation Center of Electric Vehicles in Beijing, Beijing 100081, P. R. China

\*Corresponding author. E-mail: chenrj@bit.edu.cn; lily863@bit.edu.cn

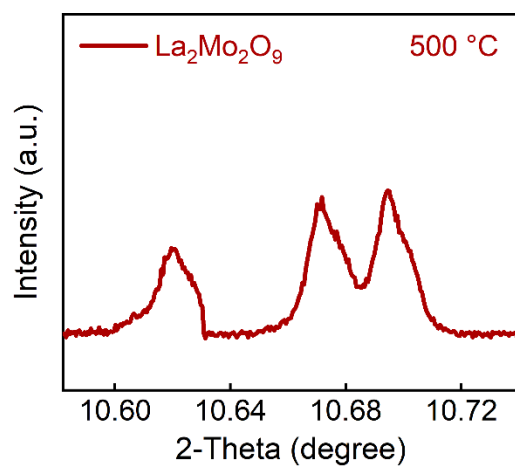

**Supplementary Fig. 1.** Selected XRD pattern for  $\text{La}_2\text{Mo}_2\text{O}_9$  (LMO).

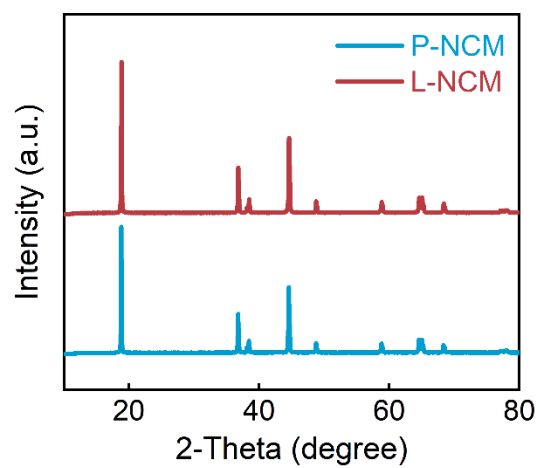

**Supplementary Fig. 2.** XRD patterns for uncycled P-NCM and L-NCM.

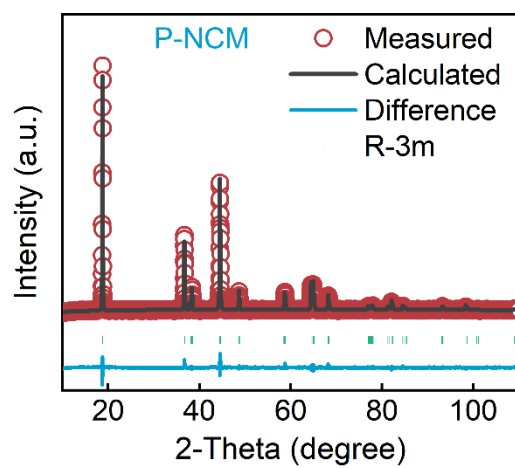

**Supplementary Fig. 3.** XRD refinement result for uncycled P-NCM.

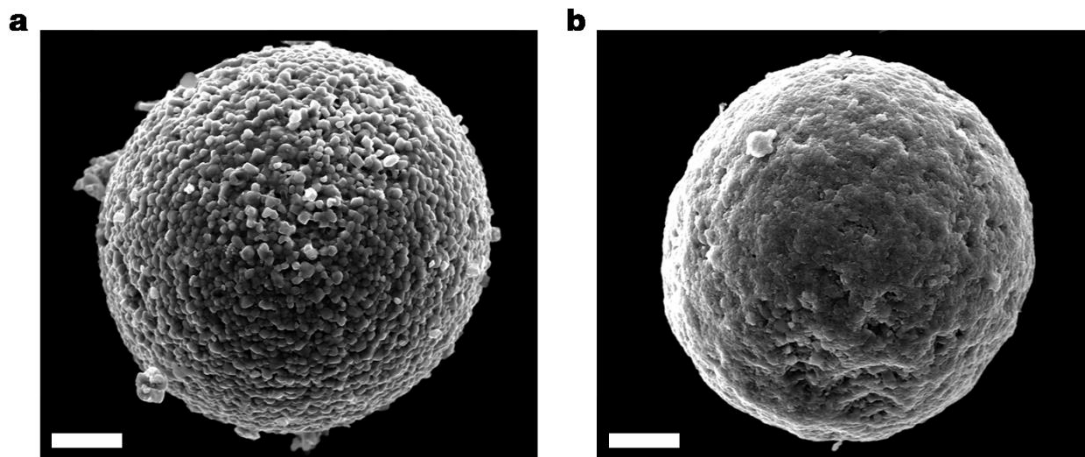

**Supplementary Fig. 4. a, b** SEM images for uncycled P-NCM (**a**) and L-NCM (**b**). Scale bars, 3  $\mu\text{m}$ .

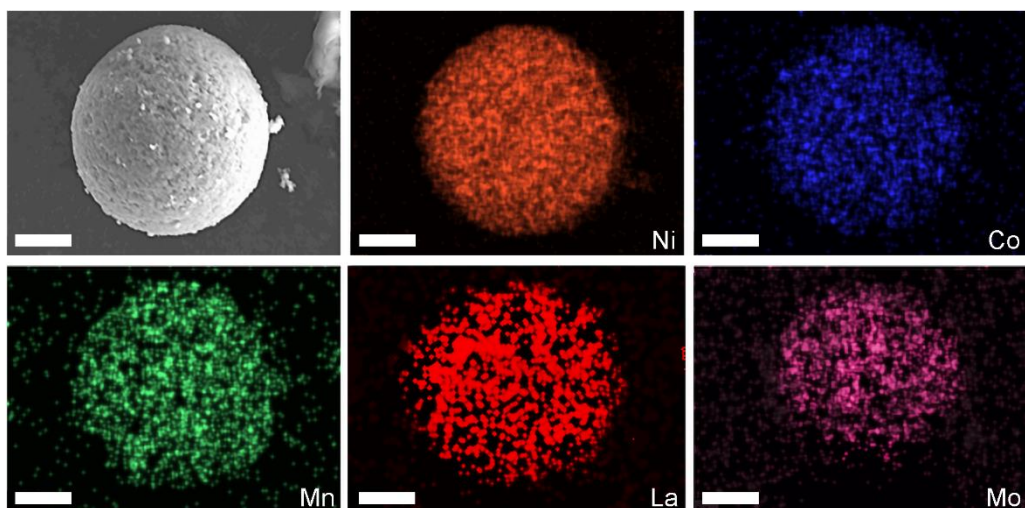

**Supplementary Fig. 5.** SEM and corresponding mapping images for uncycled L-NCM. Scale bars, 5  $\mu\text{m}$ .

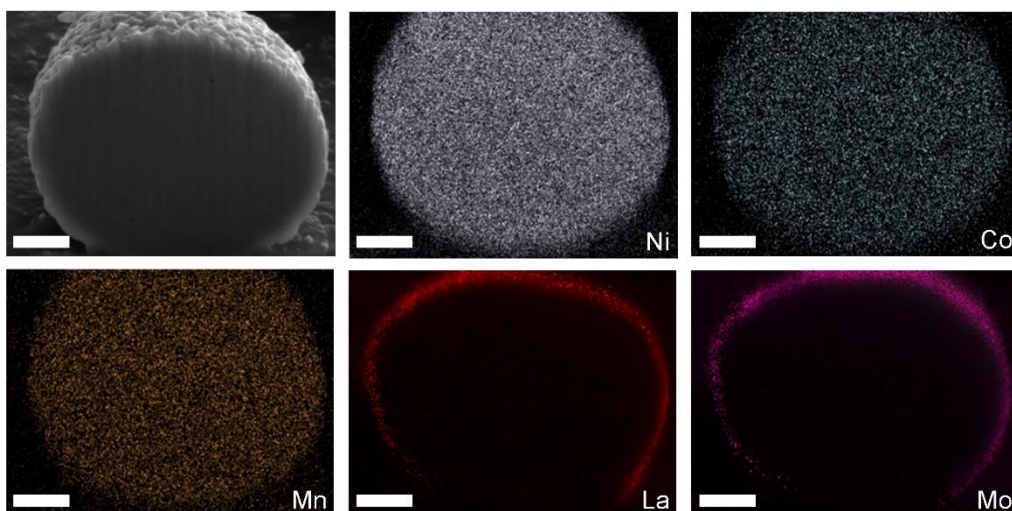

**Supplementary Fig. 6.** Cross-section morphology and the corresponding EDS mapping images for uncycled L-NCM. Scale bars, 3  $\mu\text{m}$ .

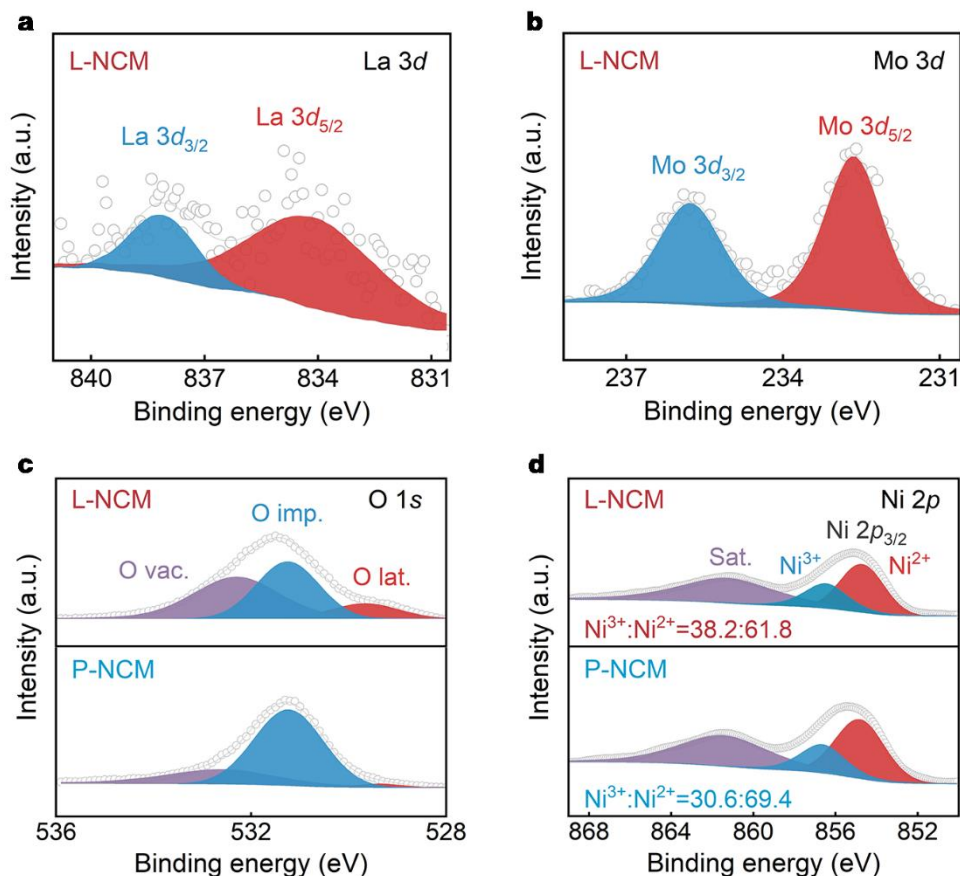

**Supplementary Fig. 7. a-d** XPS spectra of La 3d (a) and Mo 3d (b) for uncycled L-NCM, O 1s (c) and Ni 2p (d) for uncycled P-NCM and L-NCM. Note: O vac. is O vacancy, O imp. is O impurity, O lat. is O lattice, Sat. is satellite peak.

As shown in the fitted XPS spectra, the signals of La and Mo elements appeared in L-NCM surface (Supplementary Fig. 7a, b), which could be assigned to the 3d spin-orbit doublet<sup>1,2</sup>, demonstrating the successful LMO deposition. Furthermore, the ratios of O vacancy located at 532.2 eV was obviously elevated after LMO modification (Supplementary Fig. 7c)<sup>3</sup>, confirming an enriched oxygen vacancies interface were established in L-NCM surface. Moreover, the Ni 2p signals could be divided into two peaks at 854.7 and 856.5 eV (the purple is satellite peak, Supplementary Fig. 7d)<sup>4</sup>, which were ascribed to 2p<sub>3/2</sub> of Ni<sup>2+</sup> and Ni<sup>3+</sup> cations, respectively.



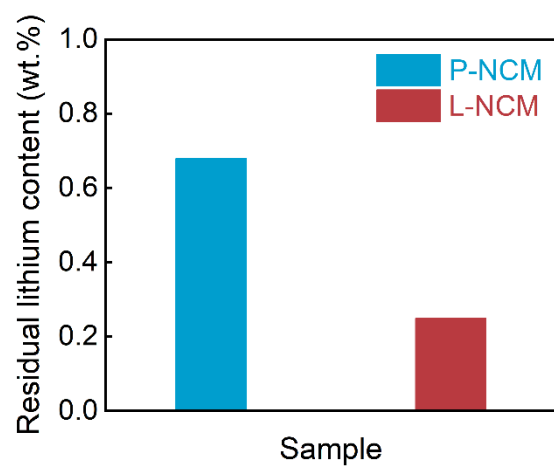

**Supplementary Fig. 8.** Residual lithium analysis for uncycled P-NCM and L-NCM.

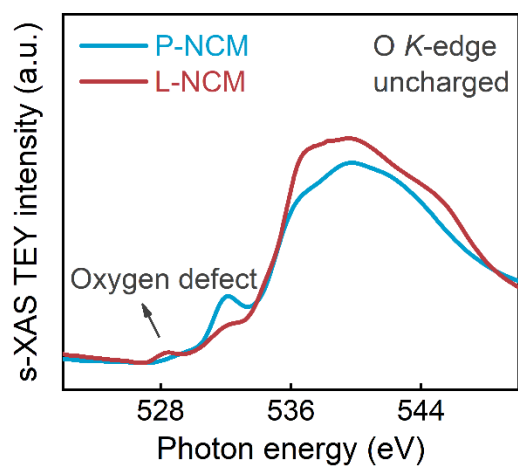

**Supplementary Fig. 9.** s-XAS spectra of O *K*-edge for uncharged P-NCM and L-NCM.

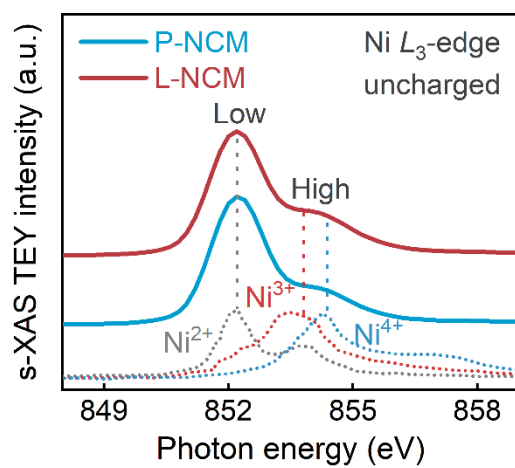

**Supplementary Fig. 10.** s-XAS spectra of Ni  $L_3$ -edge for uncharged P-NCM and L-NCM.

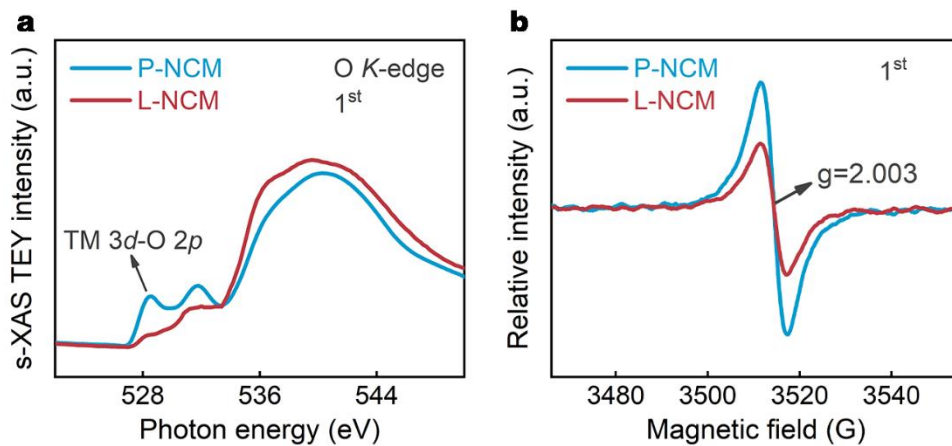

**Supplementary Fig. 11. a** s-XAS spectra of O *K*-edge at 1<sup>st</sup> charged state for P-NCM and L-NCM. **b** EPR profile at 1<sup>st</sup> charged state for P-NCM and L-NCM.

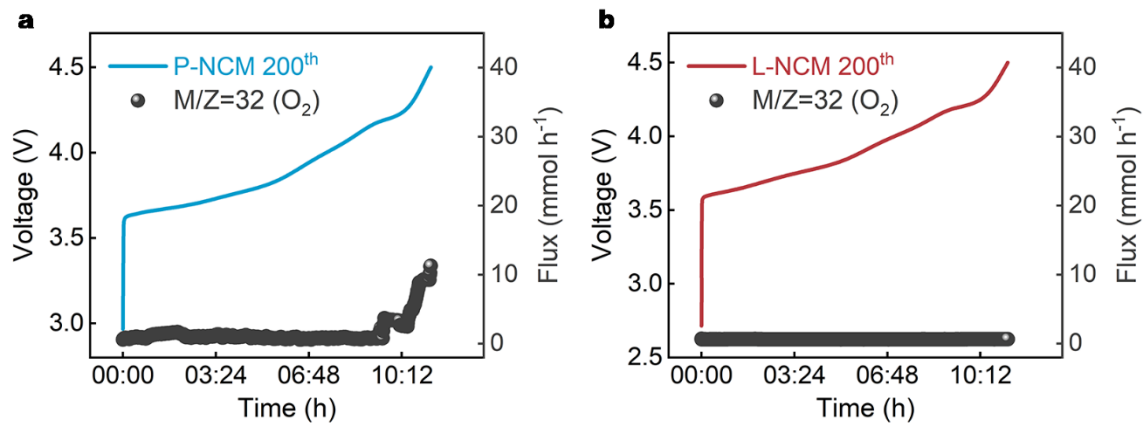

**Supplementary Fig. 12. a, b** In-situ DEMS data for P-NCM (**a**) and L-NCM (**b**) during 200<sup>th</sup> charge cycle under 2.7-4.5 V.

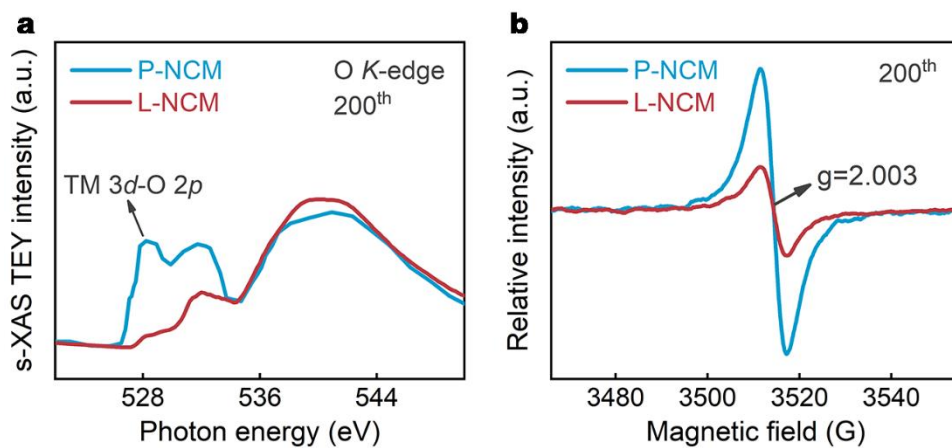

**Supplementary Fig. 13.** **a** s-XAS spectra of O *K*-edge at 200<sup>th</sup> charged state for P-NCM and L-NCM. **b** EPR profile at 200<sup>th</sup> charged state in P-NCM and L-NCM.

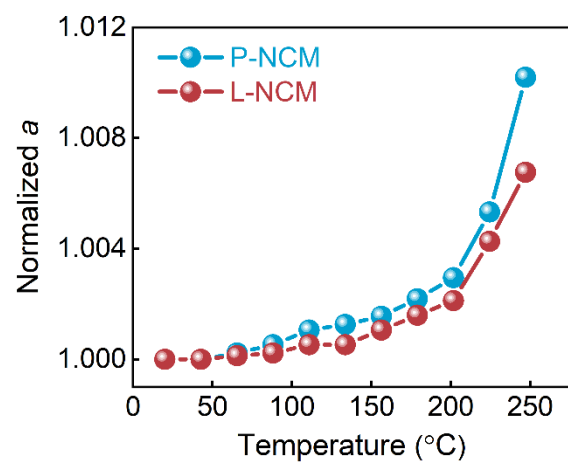

**Supplementary Fig. 14.** Evolutions of normalized  $a$ -axis for P-NCM and L-NCM.

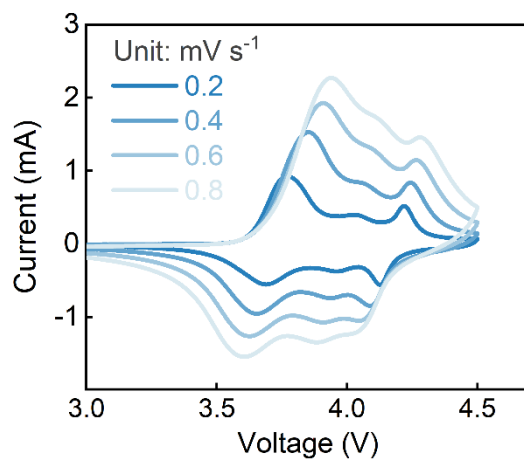

**Supplementary Fig. 15.** CV curves for P-NCM under different scan rates.



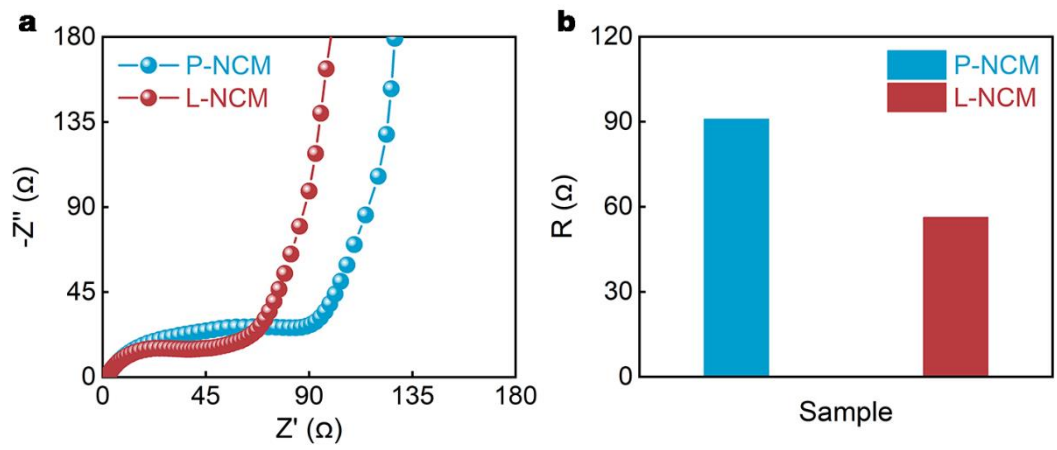

**Supplementary Fig. 16. a** Nyquist plots for P-NCM and L-NCM after 200 cycles. **b**  $R_{ct}$  values.

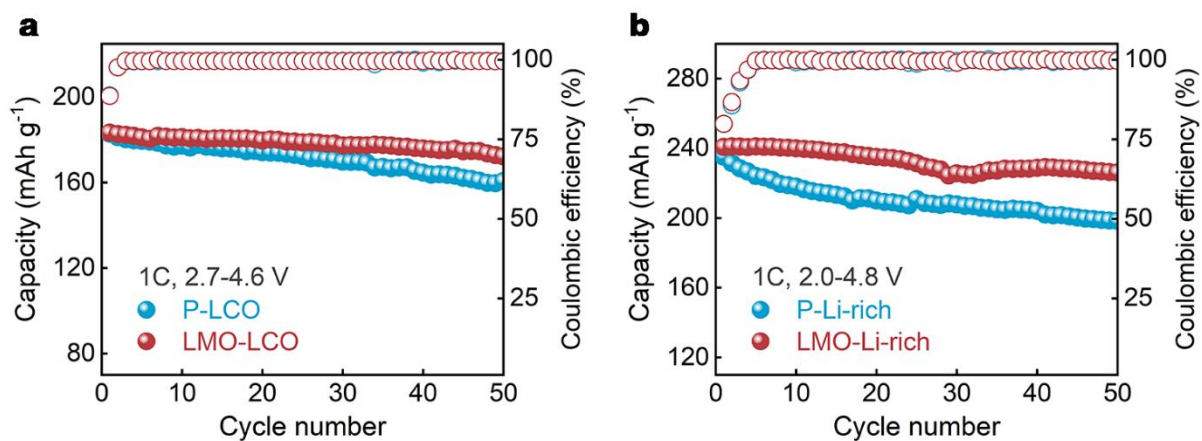

**Supplementary Fig. 17. a** Cycling performances for pristine LiCoO<sub>2</sub> (P-LCO) and LMO modified sample (LMO-LCO) in coin-type half cells at 1C under 2.7-4.6 V. **b** Cycling performances for pristine Li-rich (P-Li-rich) and LMO modified sample (LMO-Li-rich) in coin-type half cells at 1C under 2.0-4.8 V.

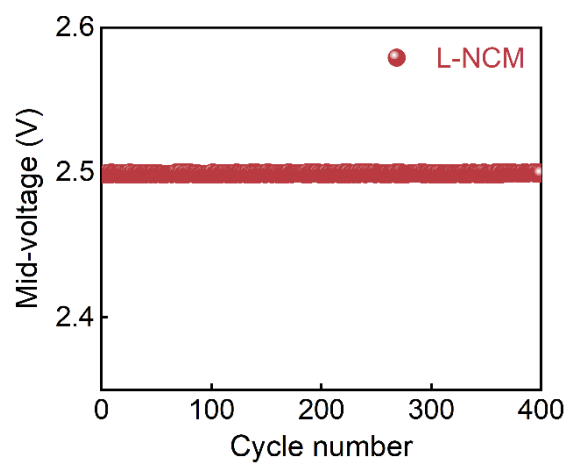

**Supplementary Fig. 18.** Voltage curve for L-NCM upon 400 cycles in pouch-type full cell at 0.5C under 2.7-4.2 V.

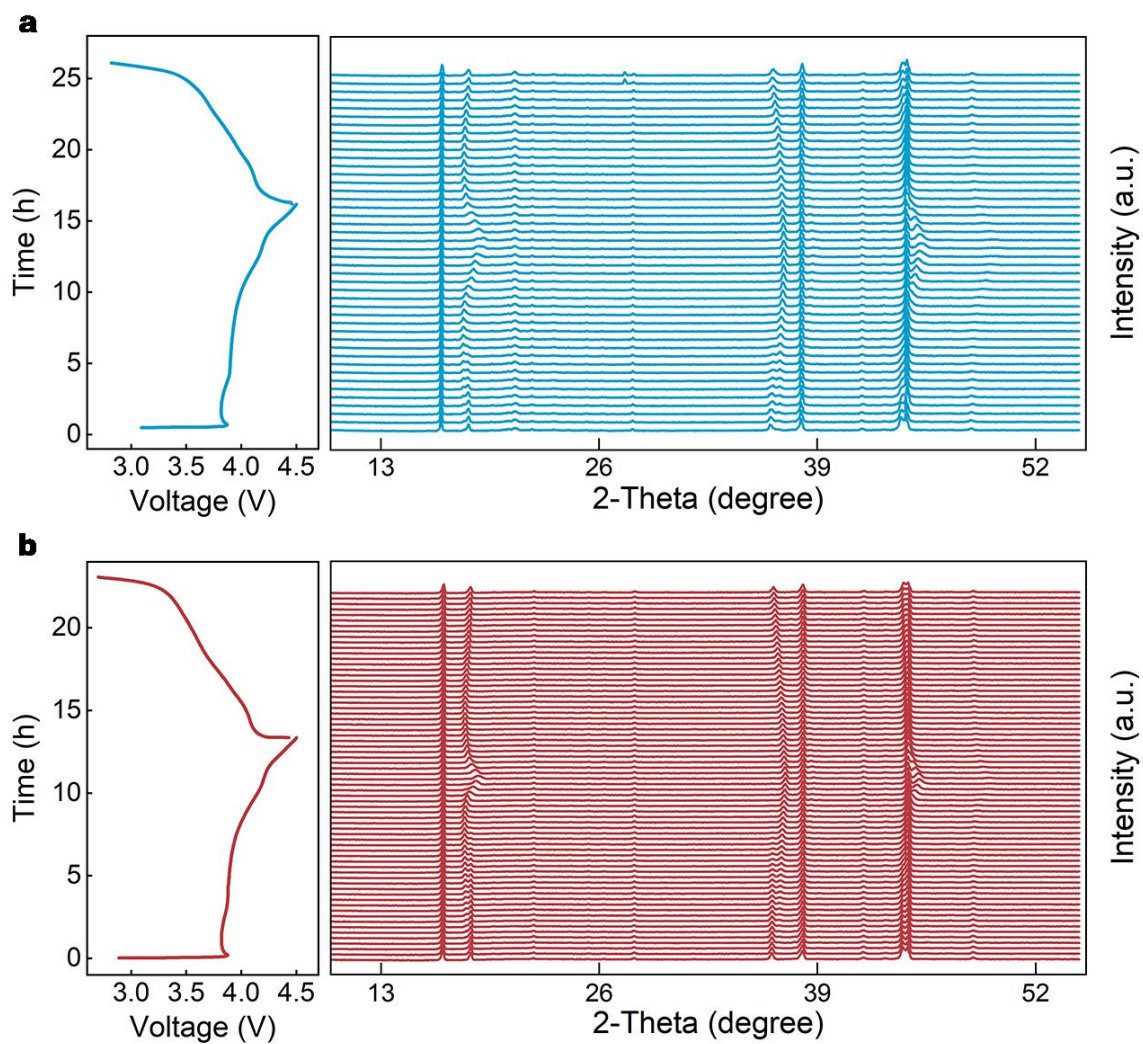

**Supplementary Fig. 19. a, b** Initial charge/discharge curves (left, 0.1C and 2.7-4.5 V) and in-situ XRD patterns (right) for P-NCM (**a**) and L-NCM (**b**).

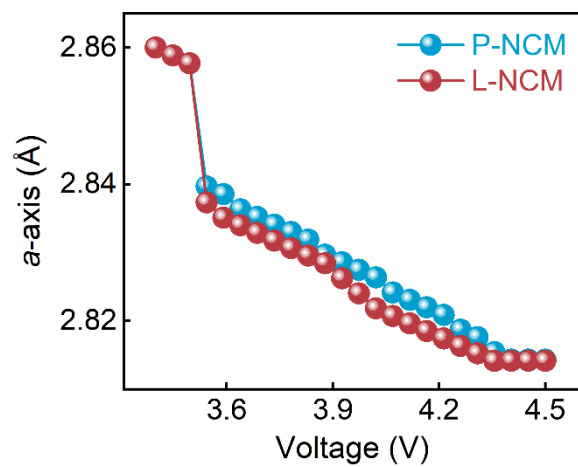

**Supplementary Fig. 20.** Lattice parameter  $a$  for P-NCM and L-NCM between 2.7 V and 4.5 V.

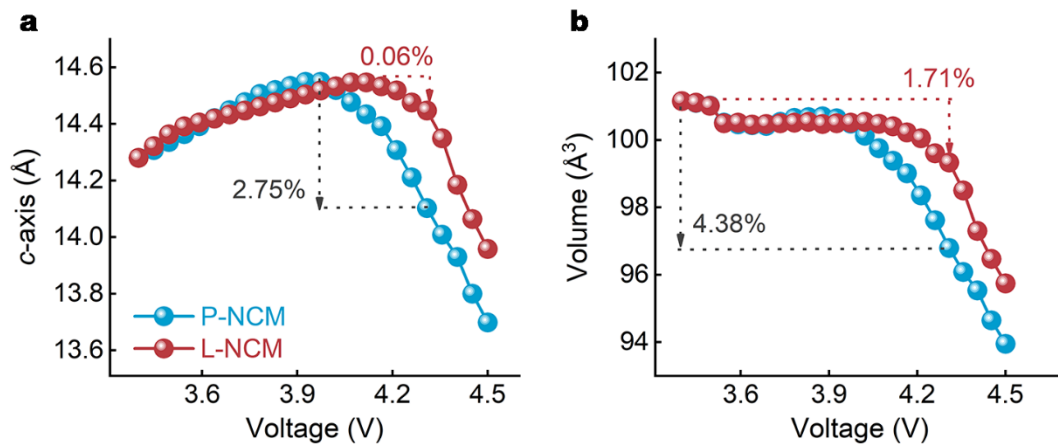

**Supplementary Fig. 21. a, b** Comparison of lattice parameters  $c$  (**a**) and volume (**b**) for P-NCM and L-NCM between 2.7 V and 4.3 V.

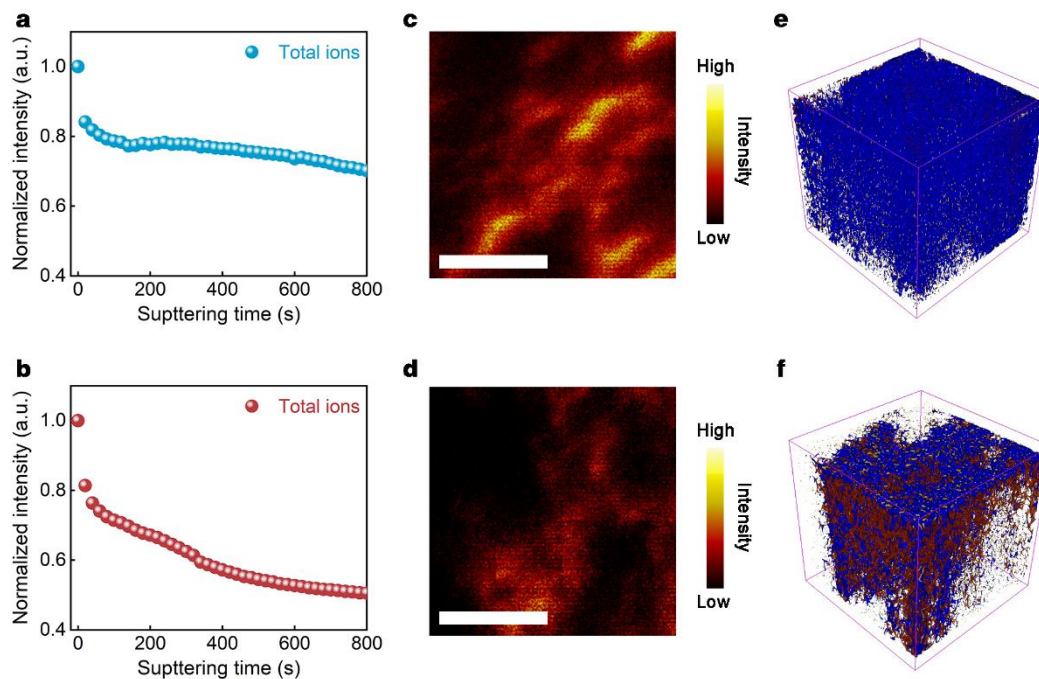

**Supplementary Fig. 22.** **a, b** Total ions distributions obtained by TOF-SIMS in P-NCM (**a**) and L-NCM (**b**) after 200 cycles. **c, d** Merged ions distributions of  $\text{PO}_2^-$ ,  $\text{C}_2\text{HO}^-$ ,  $\text{NiF}_3^-$  and  $\text{MnF}_3^-$  on P-NCM (**c**) and L-NCM (**d**) surface. Scale bars, 20  $\mu\text{m}$ . **e, f** Merged depth ions distributions of  $\text{PO}_2^-$ ,  $\text{C}_2\text{HO}^-$ ,  $\text{NiF}_3^-$  and  $\text{MnF}_3^-$  on P-NCM (**e**) and L-NCM (**f**).

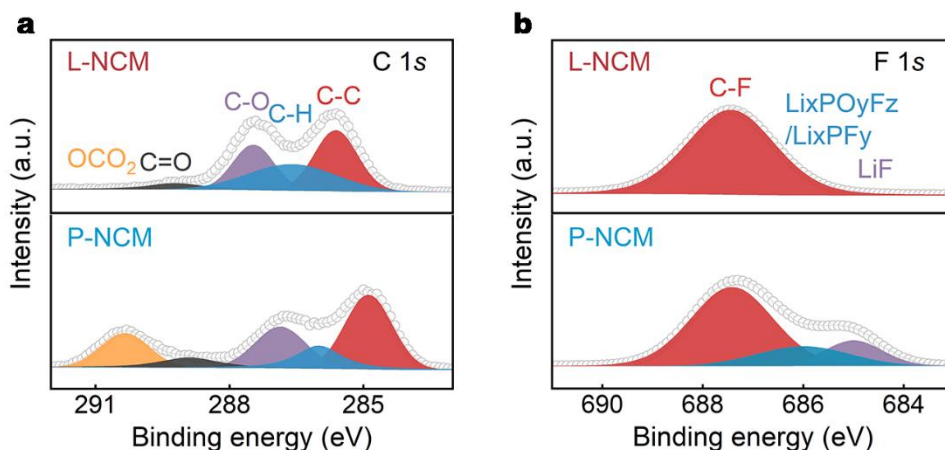

**Supplementary Fig. 23. a, b** XPS spectra for P-NCM and L-NCM cathodes after 200 cycles, C 1s (a) and F 1s (b).

As exhibited in C 1s peaks (Supplementary Fig. 23a), the C-C peaks at 285.1 eV originated from the Super P, while the peaks located at 286.2 eV (C-H) were related to PVDF binder<sup>5</sup>. The C-O (287.2 eV), C=O (289.1 eV) and OCO<sub>2</sub> (290.2 eV) species were attributed to the electrolyte decomposition<sup>6</sup>, thus the increased C-O, C=O and OCO<sub>2</sub> intensity illustrated the aggravated electrolyte decomposition on P-NCM electrode surface. Additionally, as shown in Supplementary Fig. 23b, the LiF (684.3 eV) and LixPOyFz/LixPFy (685.2 eV) in F 1s peaks were derived from the parasitic reactions at the electrode/electrolyte interface and were identified as the components of cathode-electrolyte interface (CEI)<sup>7,8</sup>. The C-F (687.1 eV) bonds could be ascribed to the PVDF binder deposited on electrode surface. Therefore, the almost disappeared LixPOyFz/LixPFy and LiF peaks in L-NCM surface compared with P-NCM confirmed the mitigated electrolyte decomposition, coinciding with above-mentioned C 1s peaks analysis.



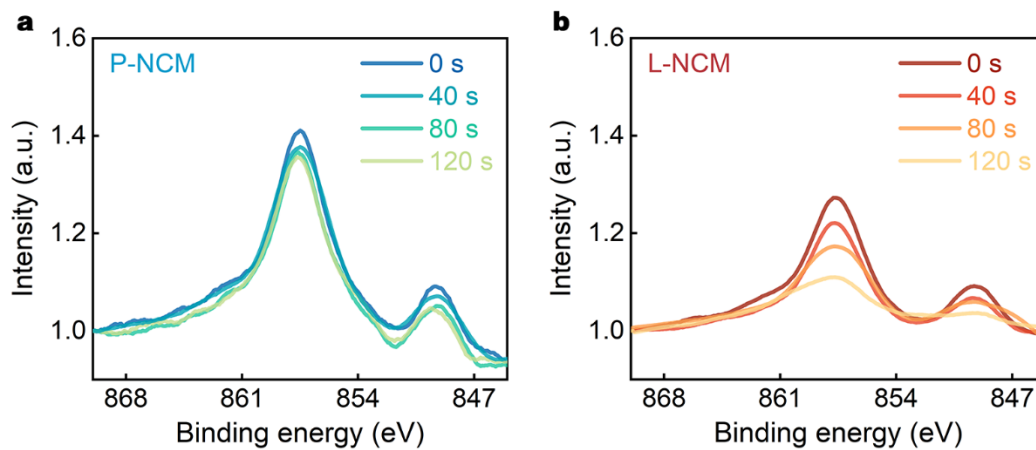

**Supplementary Fig. 24. a, b** In-depth XPS spectra for Ni on LMA surface after 200 cycles, coupled with P-NCM (**a**) and coupled with L-NCM (**b**).

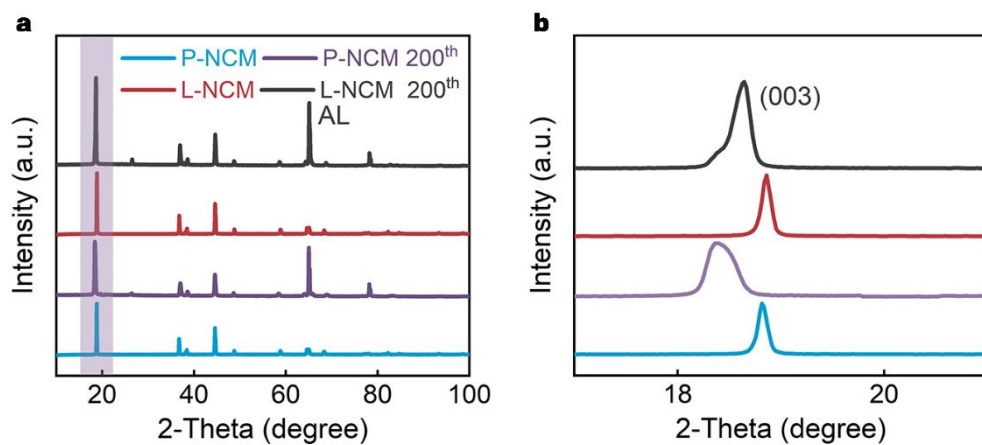

**Supplementary Fig. 25. a, b** XRD patterns (**a**) and magnified (003) peaks (**b**) for P-NCM and L-NCM before cycle and after 200 cycles.

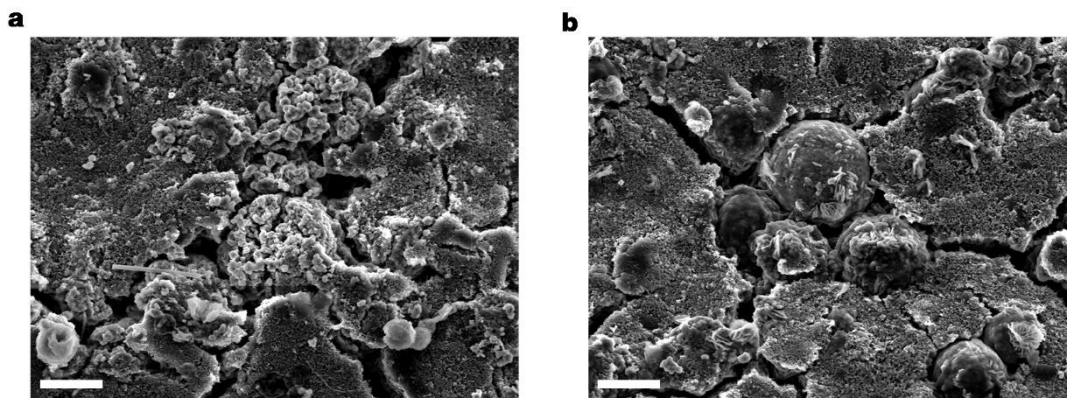

**Supplementary Fig. 26. a, b** SEM images for P-NCM (**a**) and L-NCM (**b**) after 200 cycles. Scale bars, 15  $\mu\text{m}$ .

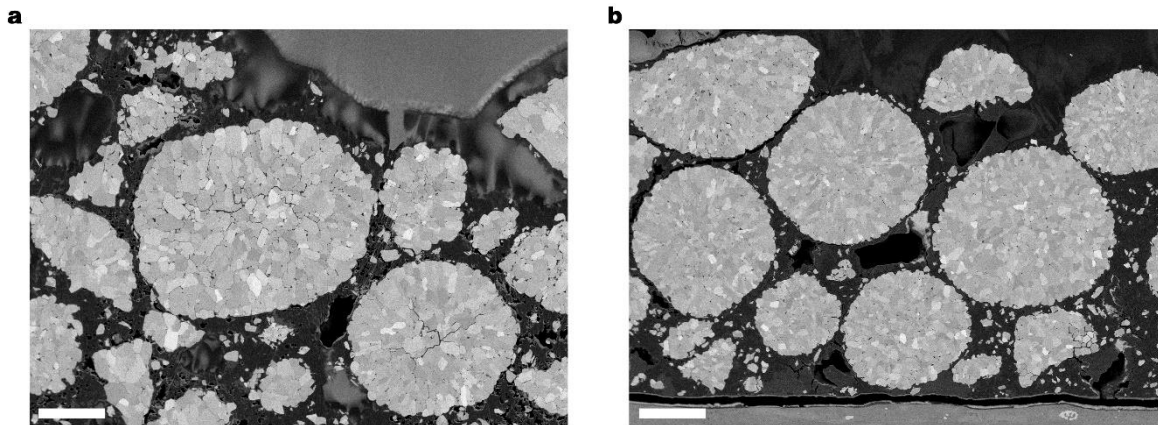

**Supplementary Fig. 27. a, b** Cross-section SEM images for P-NCM (**a**) and L-NCM (**b**) after 200 cycles. Scale bars, 5  $\mu\text{m}$ .

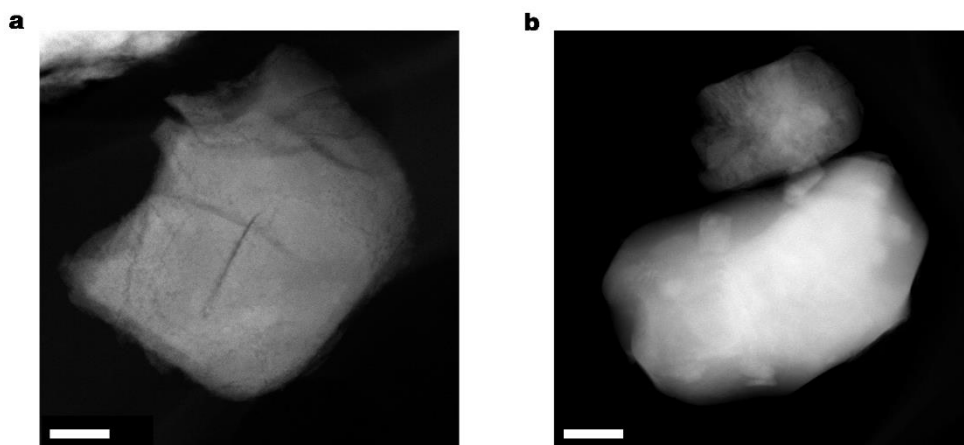

**Supplementary Fig. 28. a, b** HAADF-STEM images for P-NCM (**a**) and L-NCM (**b**) after 200 cycles. Scale bars, 100 nm.

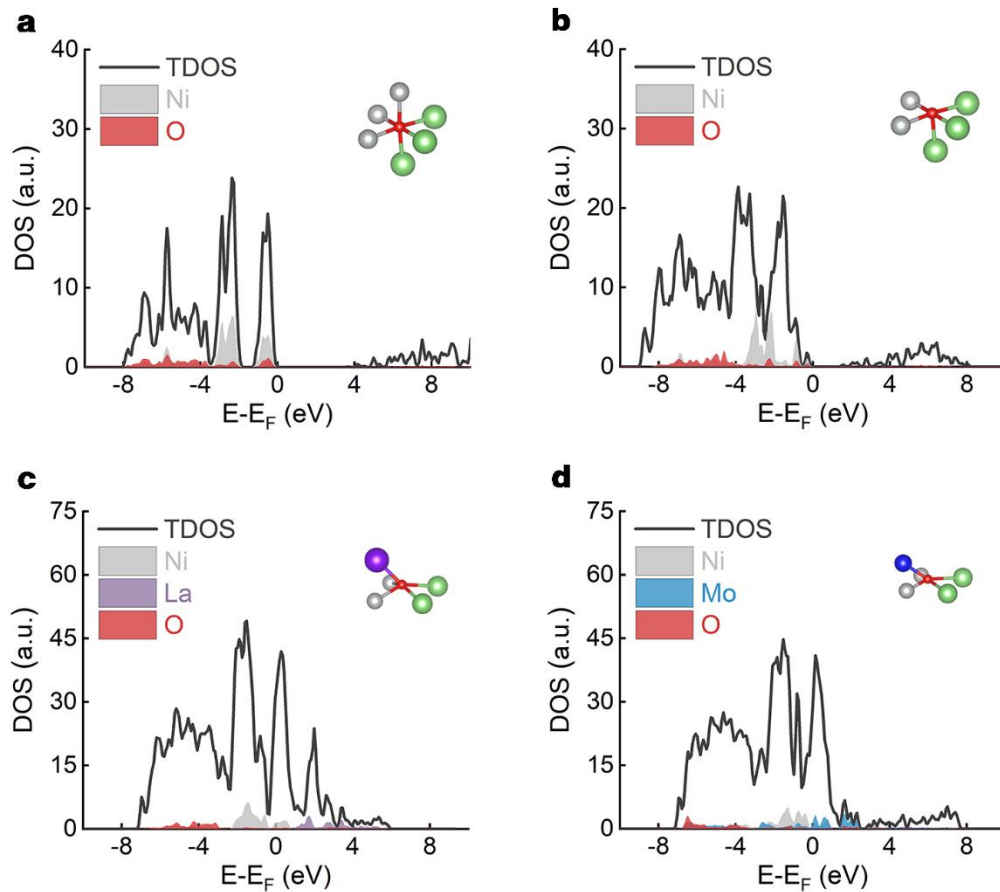

**Supplementary Fig. 29. a-d** Density of states for lattice oxygen coordinated by three Li and three Ni (**a**), surface oxygen coordinated by three Li and two Ni (**b**), surface oxygen coordinated by one La, two Li and two Ni (**c**) and surface oxygen coordinated by one Mo, two Li and two Ni (**d**). Note the elements: Li (green), Ni (gray), O (red), La (purple) and Mo (blue).

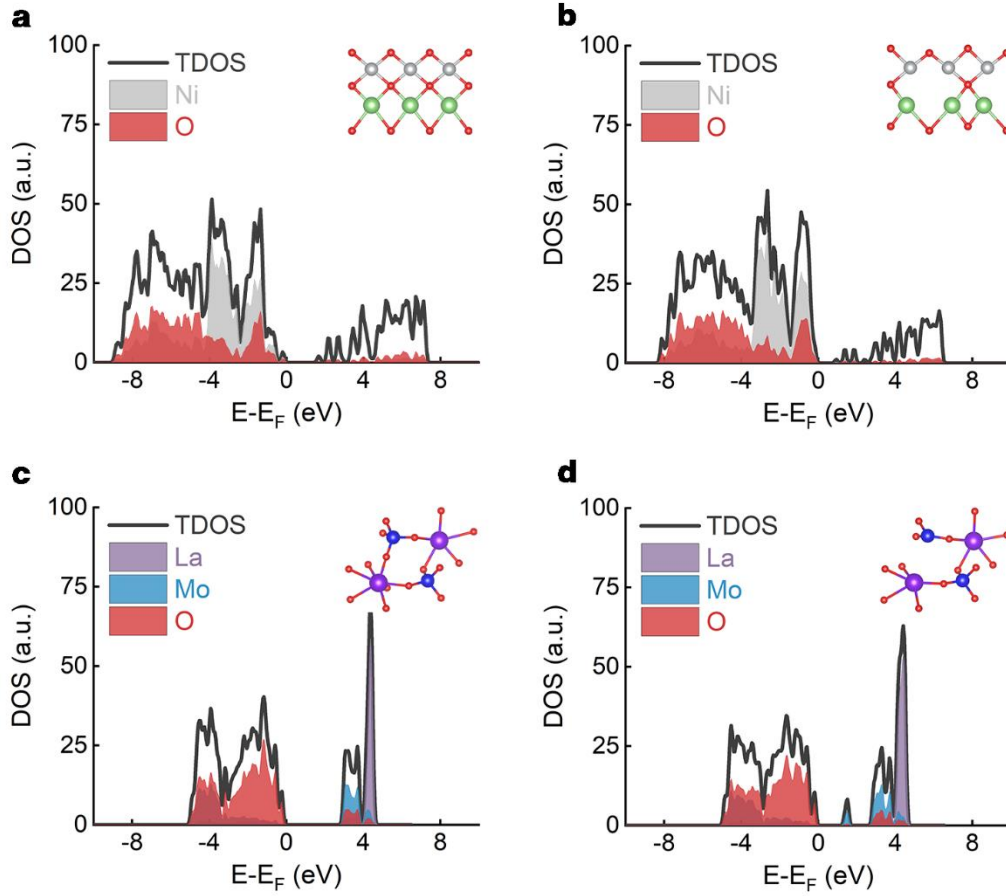

**Supplementary Fig. 30.** a-d Density of states for LNO (104) slab without defect (a) and with one oxygen defect (b), LMO (001) slab without defect (c) and with one oxygen defect (d). Note the elements: Li (green), Ni (gray), O (red), La (purple) and Mo (blue).

**Supplementary Table 1.** Lattice parameters quantified by XRD Rietveld refinement.

| <b>Sample</b> | $a = b$ (Å) | $c$ (Å) | $V$ (Å <sup>3</sup> ) | $Z_{\text{OX}}$ | $S_{\text{TMO}_6}$ (Å) | $W_{\text{LiO}_6}$ (Å) | $\text{Li}^+/\text{Ni}^{2+}$<br>(%) |
|---------------|-------------|---------|-----------------------|-----------------|------------------------|------------------------|-------------------------------------|
| <b>P-NCM</b>  | 2.8452      | 14.2035 | 101.2285              | 0.2603          | 2.0746                 | 2.6599                 | 1.36                                |
| <b>L-NCM</b>  | 2.8566      | 14.2039 | 101.2298              | 0.2598          | 2.0889                 | 2.6457                 | 1.32                                |

TM slab thickness<sup>9</sup>:  $S_{\text{TMO}_6} = 2(1/3 - Z_{\text{OX}}) \times c$ , Li slab thickness:  $W_{\text{LiO}_6} (\text{Å}) = (c/3) - S_{\text{TMO}_6}$ .



**Supplementary Table 2.** Lithium diffusion coefficient ( $\text{cm}^2 \text{s}^{-1}$ ) calculated by fitting CV data.

| <b>State</b>     | <b>P-NCM</b>           | <b>L-NCM</b>           |
|------------------|------------------------|------------------------|
| <b>Charge</b>    | $4.65 \times 10^{-11}$ | $8.68 \times 10^{-11}$ |
| <b>Discharge</b> | $2.31 \times 10^{-11}$ | $5.41 \times 10^{-11}$ |

**Supplementary Table 3.** Capacity retentions after 100 cycles under different voltages.

| <b>Sample</b> | 2.7-4.3 V | 2.7-4.4 V | 2.7-4.5 V |
|---------------|-----------|-----------|-----------|
| <b>P-NCM</b>  | 80.2%     | 65.4%     | 57.1%     |
| <b>L-NCM</b>  | 93.9%     | 87.2%     | 84.8%     |

**Supplementary Table 4.** Comparison in electrochemical performances of L-NCM under different voltages with the recent similar-focused literatures.

| Bulk material                                                                          | Modification strategy                                   | Voltage range and current density | Cycle number and capacity retention | Active material (mg cm <sup>-2</sup> ) | Reference |
|----------------------------------------------------------------------------------------|---------------------------------------------------------|-----------------------------------|-------------------------------------|----------------------------------------|-----------|
| Li <sub>0.8</sub> Ni <sub>0.1</sub> Co <sub>0.1</sub> Mn <sub>0.1</sub> O <sub>2</sub> | La <sub>2</sub> Mo <sub>2</sub> O <sub>9</sub> -coating | 2.7-4.3 V, C/3                    | 100, ~ 93.9%                        | ~ 10.0                                 | This work |
| Li <sub>0.8</sub> Ni <sub>0.1</sub> Co <sub>0.1</sub> Mn <sub>0.1</sub> O <sub>2</sub> | La <sub>2</sub> Mo <sub>2</sub> O <sub>9</sub> -coating | 2.7-4.4 V, C/3                    | 100, ~ 87.2%                        | ~ 10.0                                 | This work |
| Li <sub>0.8</sub> Ni <sub>0.1</sub> Co <sub>0.1</sub> Mn <sub>0.1</sub> O <sub>2</sub> | La <sub>2</sub> Mo <sub>2</sub> O <sub>9</sub> -coating | 2.7-4.5 V, C/3                    | 100, ~ 84.8%                        | ~ 10.0                                 | This work |
| Li <sub>0.8</sub> Ni <sub>0.1</sub> Co <sub>0.1</sub> Mn <sub>0.1</sub> O <sub>2</sub> | DMS-electrolyte additive                                | 2.75-4.5 V, 1C                    | 100, ~ 73.5%                        | ~ 4.3                                  | 10        |
| LiNi <sub>0.885</sub> Co <sub>0.1</sub> Al <sub>0.015</sub> O <sub>2</sub>             | B-doping                                                | 2.7-4.3 V, 0.5C                   | 100, ~ 95.5%                        | ~ 12.0                                 | 11        |
| Li <sub>0.8</sub> Ni <sub>0.1</sub> Co <sub>0.1</sub> Mn <sub>0.1</sub> O <sub>2</sub> | Sulfonamide-electrolyte additive                        | 3.0-4.7 V, 0.5C                   | 90, ~ 88%                           | ~ 7.5                                  | 12        |
| Li <sub>0.8</sub> Ni <sub>0.1</sub> Co <sub>0.1</sub> Mn <sub>0.1</sub> O <sub>2</sub> | Co <sub>x</sub> B-coating                               | 3.0-4.4 V, 1C                     | 100, ~ 87%                          | ~ 10.5                                 | 13        |
| Li <sub>0.8</sub> Ni <sub>0.1</sub> Co <sub>0.1</sub> Mn <sub>0.1</sub> O <sub>2</sub> | Element gradient distribution                           | 2.7-4.4 V, 0.5C                   | 100, ~ 85.1%                        | ~ 5.0                                  | 14        |
| Li <sub>0.6</sub> Ni <sub>0.2</sub> Co <sub>0.2</sub> Mn <sub>0.2</sub> O <sub>2</sub> | Annealing in steps                                      | 3.0-4.3 V, 1C                     | 100, ~ 83%                          | ~ 2.0                                  | 15        |
| Li <sub>0.6</sub> Ni <sub>0.2</sub> Co <sub>0.2</sub> Mn <sub>0.2</sub> O <sub>2</sub> | Single-crystal                                          | 3.0-4.3 V, 1C                     | 100, ~ 89.1%                        | ~ 2.0                                  | 16        |
| Li <sub>0.6</sub> Ni <sub>0.2</sub> Co <sub>0.2</sub> Mn <sub>0.2</sub> O <sub>2</sub> | Single-crystal                                          | 3.0-4.3 V, 0.1C                   | 100, ~ 83.6%                        | ~ 21.5                                 | 17        |
| LiNi <sub>0.91</sub> Co <sub>0.09</sub> O <sub>2</sub>                                 | Ta-doping                                               | 2.7-4.3 V, 0.5C                   | 100, ~ 75%                          | ~ 4.0                                  | 18        |

Note: 1C = 220 mA g<sup>-1</sup>

**Supplementary Table 5.** Bader charge analysis.

|                              | La@LiNiO <sub>2</sub> | Mo@LiNiO <sub>2</sub> |
|------------------------------|-----------------------|-----------------------|
| <b>Bader charge analysis</b> | – 1.2743 eV           | – 1.2107 eV           |

**Supplementary Table 6.** Relative parameters of pouch-type full cell.

| Full cell parameters                               |                                              |                                           |
|----------------------------------------------------|----------------------------------------------|-------------------------------------------|
|                                                    | Cathode                                      | Anode                                     |
| Sample                                             | L-NCM                                        | Graphite (Gr)                             |
| Composition                                        | L-NCM : PVDF : CNT : SP = 95% : 3% : 1% : 1% | Gr : PVDF : CNT : SP = 95% : 3% : 1% : 1% |
| Electrode density ( $\text{g cm}^{-3}$ )           | 3.00                                         | 1.60                                      |
| Negative/Positive (N/P) ratio                      | 1.12/1.00                                    |                                           |
| One-side loading level ( $\text{mg cm}^{-2}$ )     | 20.00                                        | 12.48                                     |
| One-side capacity ( $\text{mAg cm}^{-2}$ )         | 3.90                                         | 4.37                                      |
| Initial charge capacity ( $\text{mAh g}^{-1}$ )    | 217.00                                       | 384.60                                    |
| Initial discharge capacity ( $\text{mAh g}^{-1}$ ) | 195.00                                       | 350.00                                    |
| Initial coulombic efficiency (%)                   | 90.00                                        | 91.00                                     |
| Voltage range (V)                                  | 2.7-4.2                                      |                                           |

## References

- Zhu, X. et al. Epitaxial growth of an atom-thin layer on a  $\text{LiNi}_{0.5}\text{Mn}_{1.5}\text{O}_4$  cathode for stable Li-ion battery cycling. *Nat. Commun.* **13**, 1565 (2022).
- Geon, P. et al. Introducing high-valence elements into cobalt-free layered cathodes for practical lithium-ion batteries. *Nat. Energy* **7**, 946-954 (2022).
- Wang, Q. et al. Unlocking anionic redox activity in O3-type sodium 3d layered oxides via Li substitution. *Nat. Mater.* **20**, 353-361 (2021).
- Dai, Z. et al. Surface coupling between mechanical and electric fields empowering Ni-rich cathodes with superior cyclabilities for lithium-ion batteries. *Adv. Sci.* **9**, e2200622 (2022).
- Bernardine, R. et al. Two electrolyte decomposition pathways at nickel-rich cathode surfaces in lithium-ion batteries. *Energy Environ. Sci.* **15**, 3416 (2022).
- Zou, Y. et al. Interfacial model deciphering high-voltage electrolytes for high energy density, high safety, and fast-charging lithium-ion batteries. *Adv. Mater.* **33**, 2102964 (2021).
- Yu, H. et al. Surface enrichment and diffusion enabling gradient-doping and coating of Ni-

- rich cathode toward Li-ion batteries. *Nat. Commun.* **12**, 4564 (2021).
- 8 Xu, M. et al. Development of novel lithium borate additives for designed surface modification of high voltage  $\text{LiNi}_{0.5}\text{Mn}_{1.5}\text{O}_4$  cathodes. *Energy Environ. Sci.* **9**, 1308 (2016).
  - 9 Lee, W. et al. New insight into Ni-rich layered structure for next-generation Li rechargeable batteries. *Adv. Energy Mater.* **8**, 1701788 (2018).
  - 10 Wu, F. et al. High-voltage and high-safety nickel-rich layered cathode enabled by a self-reconstructive cathode/electrolyte interphase layer. *Energy Storage Mater.* **41**, 495 (2021).
  - 11 Ryu, H. et al. A highly stabilized Ni-rich NCA cathode for high-energy lithium-ion batteries. *Mater. Today* **36**, 73 (2020).
  - 12 Xue, W. et al. Ultra-high-voltage Ni-rich layered cathodes in practical Li metal batteries enabled by a sulfonamide-based electrolyte. *Nat. Energy* **6**, 495 (2021).
  - 13 Ryu, H. et al. Reactive boride infusion stabilizes Ni-rich cathodes for lithium-ion batteries. *Nat. Energy* **6**, 362 (2022).
  - 14 Lin, R. et al. Hierarchical nickel valence gradient stabilizes high-nickel content layered cathode materials. *Nat. Commun.* **12**, 2350 (2021).
  - 15 Park, H. et al. In situ multiscale probing of the synthesis of a Ni-rich layered oxide cathode reveals reaction heterogeneity driven by competing kinetic pathways. *Nat. Chem.* **14**, 614 (2022).
  - 16 Zhang, F. et al. Surface regulation enables high stability of single-crystal lithium-ion cathodes at high voltage. *Nat. Commun.* **11**, 3050 (2020).
  - 17 Bi, Y. et al. Reversible planar gliding and microcracking in a single-crystalline Ni-rich cathode. *Science* **370**, 1313 (2020).
  - 18 Sun, H. et al. Transition metal-doped Ni-rich layered cathode materials for durable Li-ion batteries. *Nat. Commun.* **12**, 6552 (2021).
